# Supplementary material
Source: PubMed Central journal article supplement (PMC6437709)
Supplement: AJA-27-403-s001.pdf [file AJA-27-403-s001.pdf]

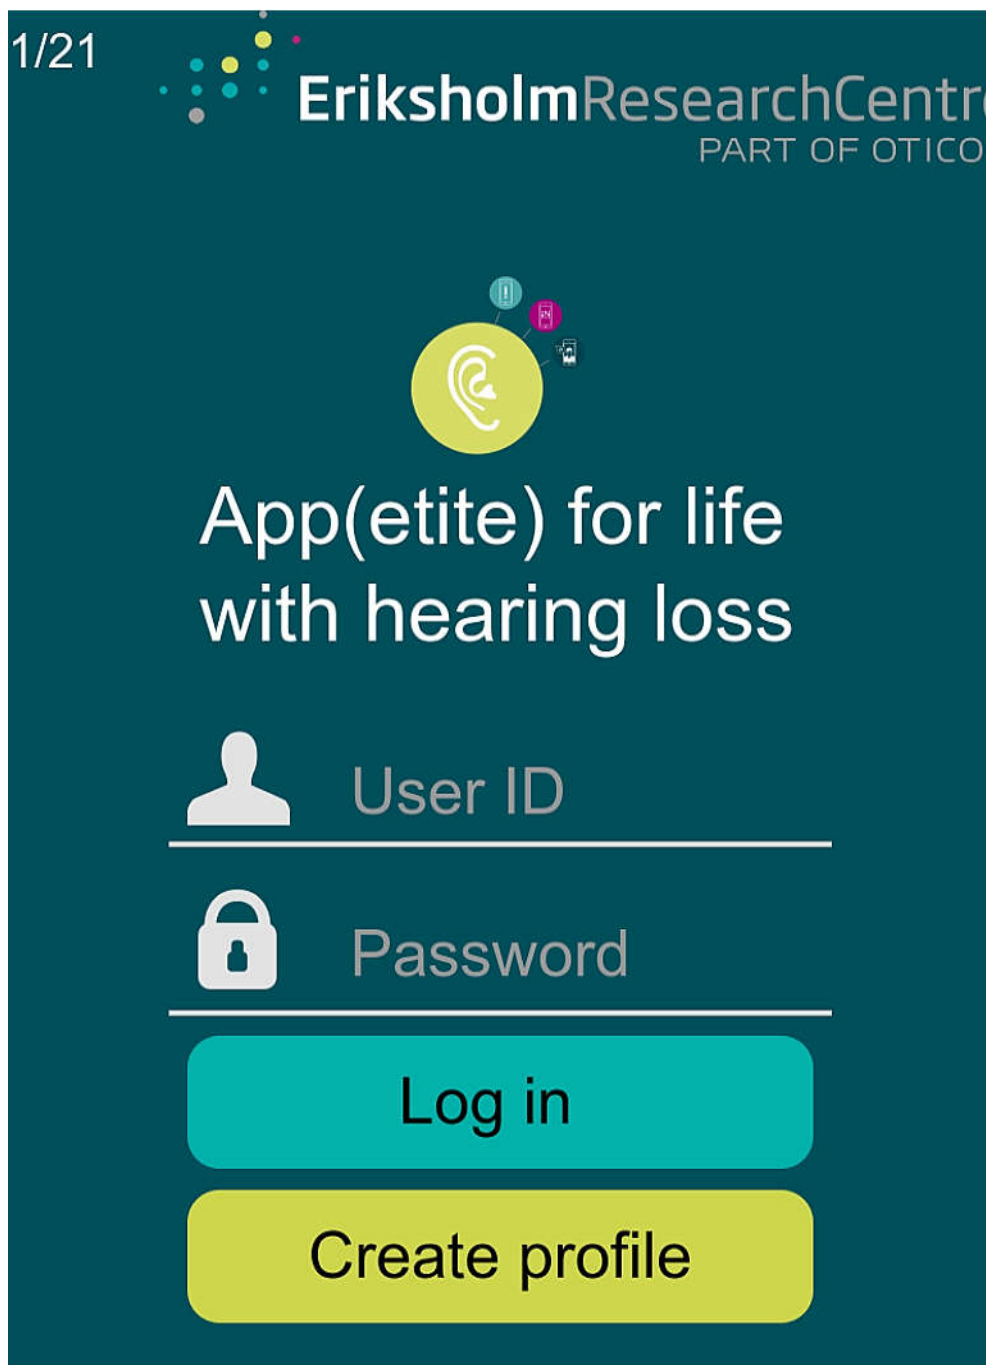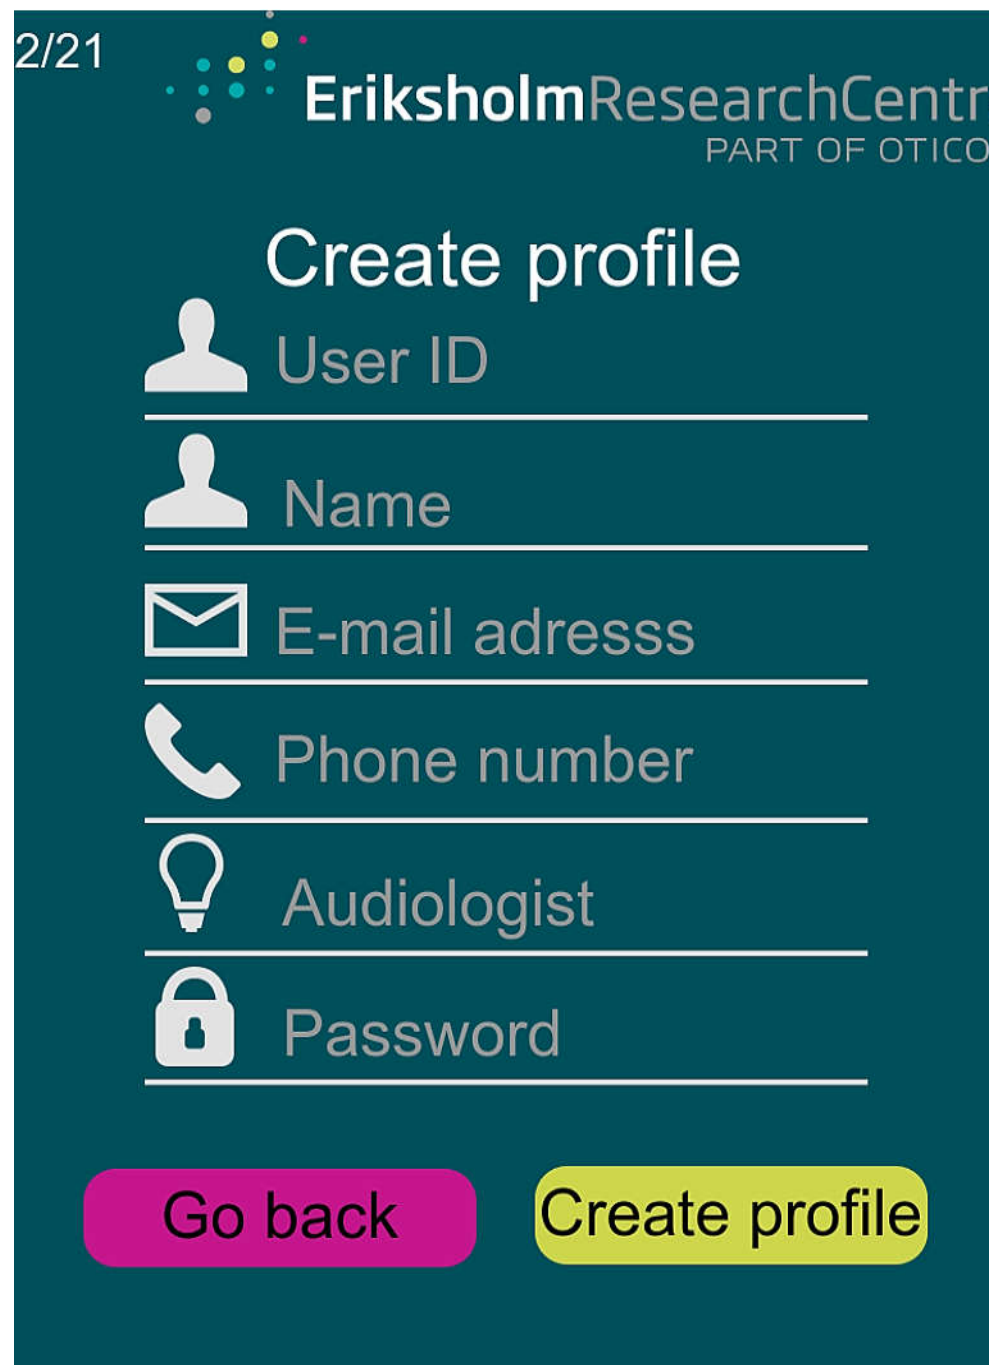

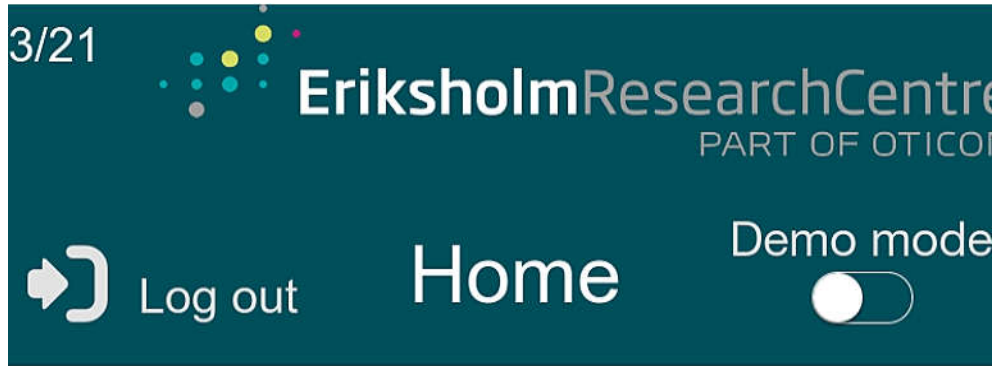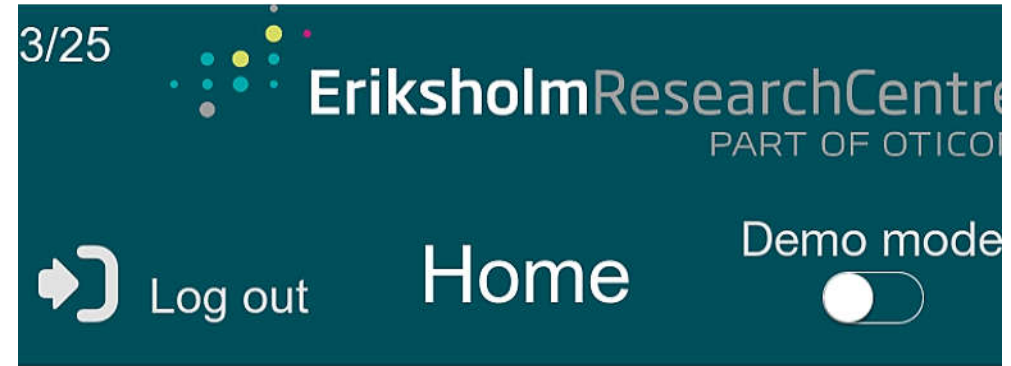

1  My expectations

2  My personal hearingcoach

3  My development

Go back

1  My expectations

2  My personal hearingcoach

3  My development

Go back

**Demo mode**  
Be aware that you are not able to contact audiologist during demo mode  
[OK](#)

4/21 Eriksholm Research Centre  
PART OF OTICOM

 My expectations

Front page

5/21 Eriksholm Research Centre  
PART OF OTICOM

 My expectations

My hearing

Here you can see your audiograms. The blue line shows your left ear hearing and the red line shows your right ear hearing. There is also a black line showing the average hearing for a person of your age.

My hearing

My important listening situations

My listening preferences

Go back

Click here to receive more information about how to use til image below

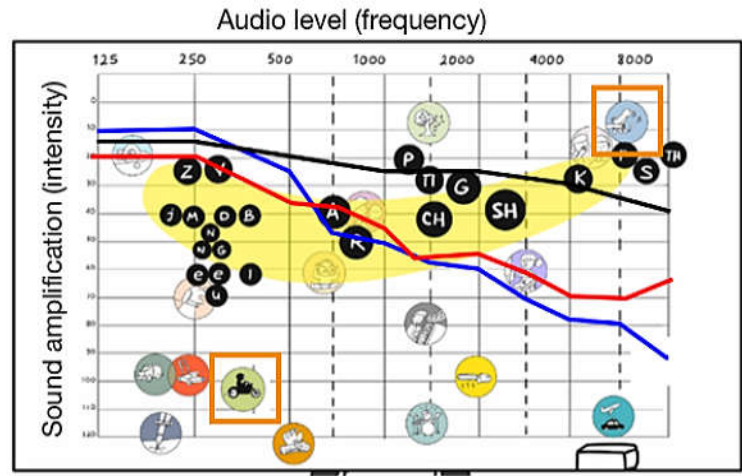

Next



5/25

# My expectations

## My hearing

Here you can see your audiograms. The blue line shows your left ear hearing and the red line shows your right ear hearing. There is also a black line...

All sounds and letters in the yellow 'talking-banana', which are above your audiogram lines are difficult for you to hear. You can test out the sounds and letters by clicking the different images and letters above and below your audiogram. They will give you a sound experience of how much your hearing aids helps you, if you listen to the sounds both with and without your hearing aids. This knowledge can also be used to let others know about your specific hearing loss. If you want to know more, please watch this video:

Close

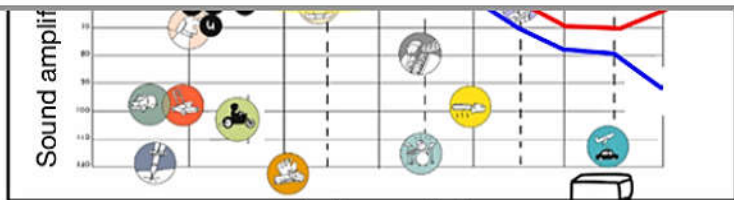

Next

6/21

# My expectations

## My important listening situations

Click on the listening scenarios/situations where it is most important to you to be able to hear well and afterwards click 'send to audiologist' with a short comment about why those specific situations are important.

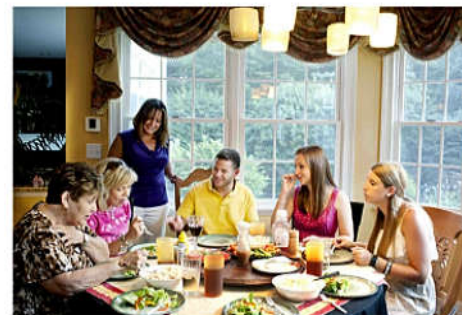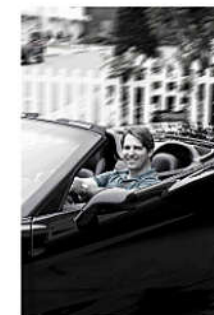

Choose another option...

Describe your own listening situations...

Send to audiologist

7/21 Eriksholm Research Centre  
PART OF OTICOM

 My expectations

My listening preferences

Here you have the sound of a car in two different audio configurations. Listen to the sounds and choose the sound you prefer by clicking the light green button. If you wish to modulate the sounds, use the sliders.

Car soft:

Play soft sound

Self modulation:

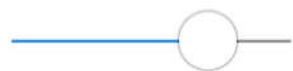

Car harsh:

Play harsh sound

Self modulation:

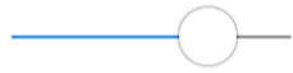

Send to audiologist

8/21 Eriksholm Research Centre  
PART OF OTICOM

 My personal hearing coach

Configuration - my solution

The first time you use *My personal hearing coach* you will need to specify how much time you want to spend training during a week. Choose the solution you prefer by clicking one of the buttons below.

Beginners (tips & tricks and mentor)

Intermediate (beginners + task)

Advanced (intermediate + audiology and communication strategies)

Next

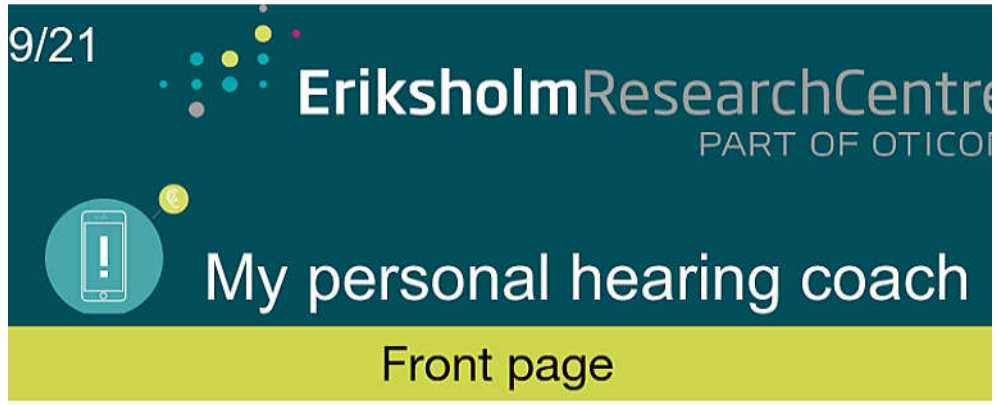

Front page

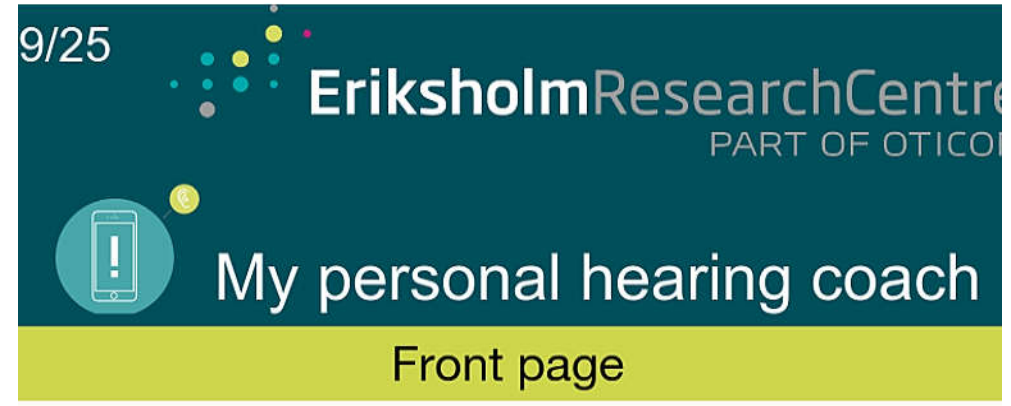

Front page

Tips and tricks

Tasks

Reading material

Mentor testimonials

Go back

Tips and tricks

News from your audiologist  
Your audiologist has sent you new material for your training

OK

Reading material

Mentor notes

Go back



10/21

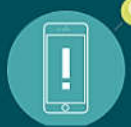

## My personal hearing coach

### Tips and tricks

Battery change video:

Choose other options...

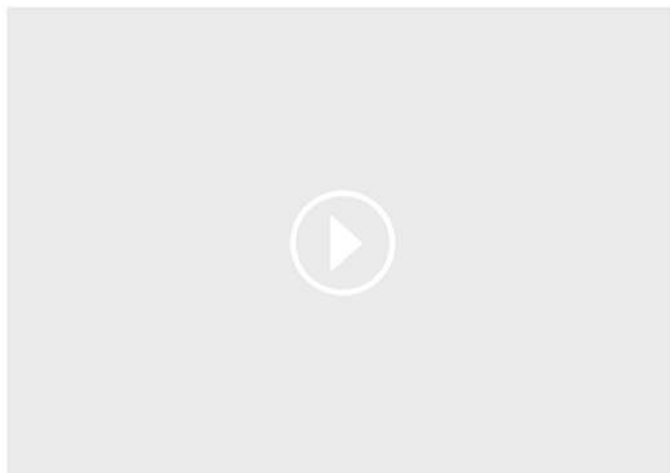

Play video

Go back

11/21

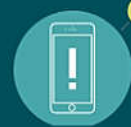

## My personal hearing coach

### Tasks - level of satisfaction with hearing aids questionnaire

Try listening to the different sounds surrounding you throughout the day. Find out if the tonal balance is fitting. Remember that the sounds will be experienced differently with your hearing aids, than without them. How would you generally describe the sound quality of your hearing aids?

Pleasant

Too harsh, metallic, too light tones

Too muted, toneless, too dark tones

Echo

Comments...

Next

12/21 Eriksholm Research Centre  
PART OF OTICON

My personal hearing coach

Reading material and other resources

Your audiologist recommend that you read the book below to learn more about hearing loss.

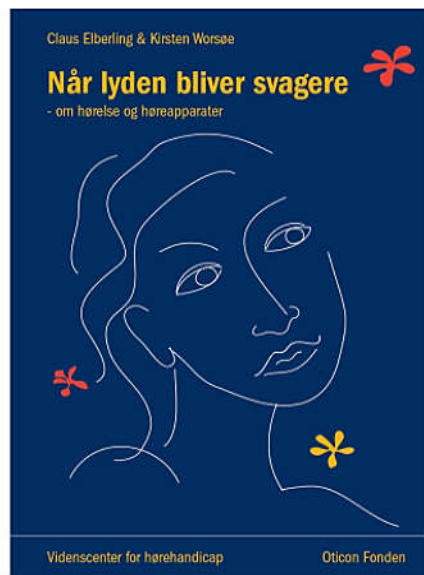

Choose other options...

Next

13/21 Eriksholm Research Centre  
PART OF OTICON

My personal hearing coach

Mentor testimonials

Tina found it difficult to get used to hearing aids to start with.

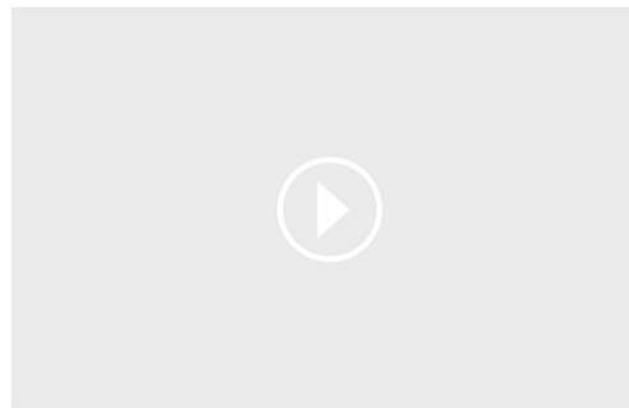

Choose another option...

Play video

Write to mentor...

Go back



14/21

Eriksholm Research Centre  
PART OF OTICOM



## My development

Front page

My hearing tests

My important listening situations

My data

Go back

15/21

Eriksholm Research Centre  
PART OF OTICOM



## My development

My hearing tests

Speech comprehension test

Other tests

Satisfaction with hearing aids

Go back

10/25 Eriksholm Research Centre PART OF OTICOM

My development

My hearing tests

16/21 Eriksholm Research Centre PART OF OTICOM

My development

My hearing tests - speech comprehension test

Speech comprehension test

**Coming soon**  
We are working on developing more test options

Other tests

Satisfaction with hearing aids

Go back

Which three numbers did you hear? Choose the numbers you heard.

|   |   |   |            |
|---|---|---|------------|
| 1 | 2 | 3 | Play again |
| 4 | 5 | 6 |            |
| 7 | 8 | 9 | My data    |
| 0 |   |   |            |

Go back

17/21 Eriksholm Research Centre PART OF OTICOM

My development

My data - my hearing tests

18/21 Eriksholm Research Centre PART OF OTICOM

My development

My data

The black line shows the normal loss of speech comprehension in relation to your age. The red dots show your speech comprehension tests at different times.

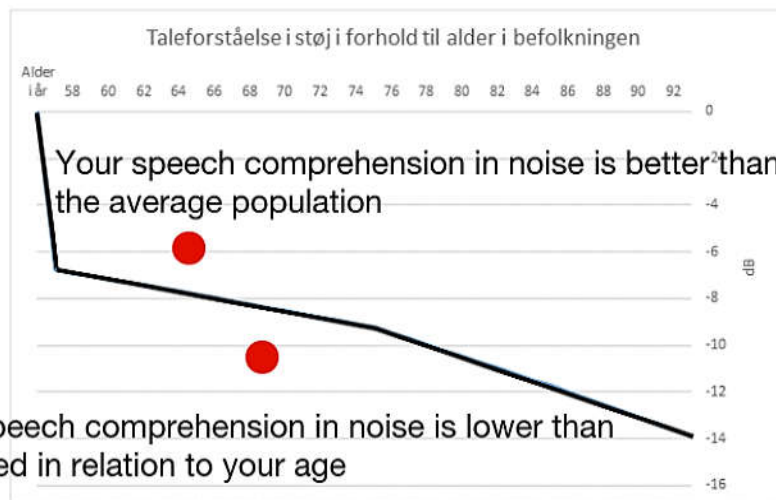

My hearing tests

My important hearing situations

Go back

Go back

19/21 Eriksholm Research Centre PART OF OTICOM

My development

My data - my important listening situations

Choose listening scenarios Choose other options...

Scenario 1: Family dinner

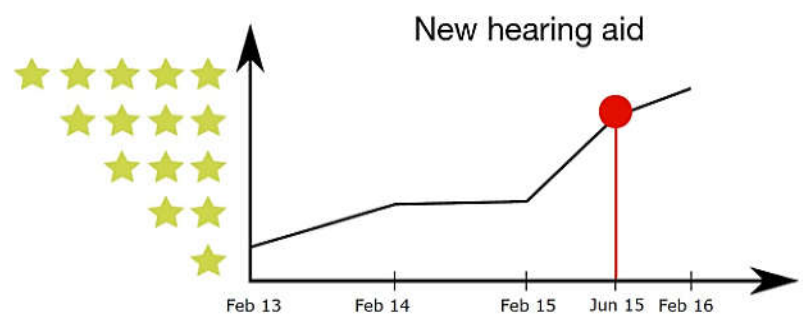

Go back

20/21 Eriksholm Research Centre PART OF OTICOM

My development

My important listening situations

Describe below listening situations where you would like to follow the development of how satisfied you are. Choose other options...

Describe the listening situation (ex. family dinner)

Rate situation

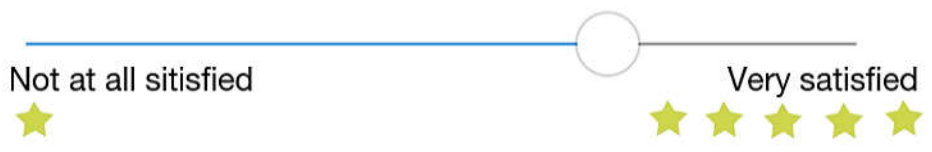

Rate



21/21

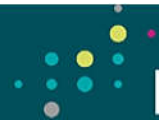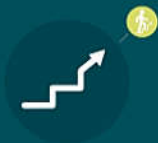

## My development

### My hearing tests - satisfaction with hearing aids questionnaire

Imagine the situation where you first and foremost wanted to be able to hear better, before you got the hearing aids you have now. How much have your hearing aid helped you in that specific situation in the past two weeks?

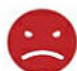

Not at all

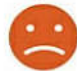

A little bit

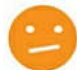

Some

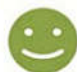

A lot

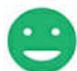

Significantly

Continue to 'my important listening situations'
